Foster J.R. GROWTH AND MORTALITY RESPONSE TO DEFOLIATION

1 **Xylem traits and growth phenology predict growth and mortality response to defoliation in**  
2 **temperate forests**

3

4 **JANE R. FOSTER<sup>a1\*</sup>**

5 J.R. Foster (Corresponding author)

6 <sup>a</sup> University of Wisconsin Madison

7 Department of Forest and Wildlife Ecology

8 120 Russell Labs

9 1630 Linden Dr

10 Madison WI 53706-1520

11 USA

12 <sup>1</sup>(Present address)

13 University of Minnesota

14 Department of Forest Resources

15 115 Green Hall

16 1530 Cleveland Ave. N.

17 St. Paul, MN 55108

18 email: jrfoster@umn.edu

19 **Running headline:** GROWTH AND MORTALITY RESPONSE TO DEFOLIATION

20 **Key-words:** ecophysiology, forest dynamics, forest models, hydraulic architecture, insect

21 disturbance, non-structural carbohydrates, phenology, plant population and community

22 dynamics, plant-herbivore interactions

## Foster J.R. GROWTH AND MORTALITY RESPONSE TO DEFOLIATION

### 23 **Abstract**

24 Defoliation outbreaks are biological disturbances that alter tree growth and mortality in  
25 temperate forests. Trees respond to defoliation in many ways; some recover rapidly, while others  
26 decline gradually or die. These differences may arise from species functional traits that constrain  
27 growth such as xylem anatomy, growth phenology or non-structural carbohydrate (NSC) storage,  
28 but this has not been shown. Although many studies address these phenomena, varied and  
29 idiosyncratic measures limit our ability to generalize and predict defoliation responses across  
30 species. I synthesized and translated published growth and mortality data into consistent  
31 standardized variables suitable for numerical models. I analyzed data from 32 studies, including  
32 16 tree species and 10 defoliator systems from North America and Eurasia, and quantitatively  
33 compared responses to defoliation among species and tree functional groups using linear mixed-  
34 effects models.

35 Relative growth decreased linearly or curvilinearly as defoliation stress accumulated across  
36 species. Growth decreased by only 5-20% following 100% defoliation in ring-porous *Quercus*,  
37 whereas growth of diffuse-porous hardwoods and conifers declined by 50-100%. Mortality  
38 increased exponentially with defoliation, more rapidly for *Pinus* and diffuse-porous species than  
39 for *Quercus* and *Abies*. Species-specific mixed models were best ( $R^2c = 0.83-0.94$ ), yet  
40 functional-group models lost little in terms of goodness-of-fit ( $R^2c = 0.72-0.92$ ), providing useful  
41 alternatives when species data is lacking. These responses are consistent with functional  
42 differences in wood growth phenology and NSC storage. Ring-porous spring xylem growth  
43 precedes budburst. Defoliators whose damage follows foliar development can only affect  
44 development of later wood. Growth of diffuse-porous and coniferous species responds more  
45 drastically, yet differences in NSC storage make them more vulnerable to mortality as stress  
46 accumulates. Ring-porous species resist defoliation-related changes in growth and mortality

## Foster J.R. GROWTH AND MORTALITY RESPONSE TO DEFOLIATION

47 more than diffuse-porous and coniferous species. These findings apply in general to disturbances

48 that cause spring defoliation and should be incorporated into forest vegetation models.

49

50

## Foster J.R. GROWTH AND MORTALITY RESPONSE TO DEFOLIATION

### 51 **Introduction**

52 Tree and forest response to spring defoliation is a complex process. Trees lose photosynthetic  
53 potential when they are defoliated early in the growing season, resulting in changes in growth.  
54 They also die more often as defoliation stress interacts with other mortality factors. Yet trees are  
55 long-lived, sessile organisms that must weather many disturbances over their lifetimes. In  
56 adapting to this life history, they have become resilient to a wide range of climatic variation and  
57 disturbance, including some amount of herbivory and defoliation. This adaptive resilience can  
58 mask the effects of defoliation when disturbance years are observed in isolation, as some trees  
59 show negligible response. Yet as stress accumulates over successive years of an outbreak,  
60 changes in tree growth and mortality become more severe, consistent and interpretable  
61 (MacLean 1980).

62 Tree responses to stress are increasingly viewed through the lens of inter-specific  
63 differences in functional traits including leaf and wood growth phenology, xylem anatomy, and  
64 non-structural carbohydrate (NSC) storage (Wiley & Helliker 2012, Panchen et al. 2014, Sevanto  
65 et al. 2014). Ensembles of these traits are often linked. For example, deciduous species that leaf  
66 out later tend to have larger xylem vessels than species that leaf out earlier (Lechowicz 1984,  
67 Panchen et al. 2014), while species that store NSC primarily in leaves (conifers) tend to break  
68 bud latest of all (Hoch et al. 2003, Michelot et al. 2012). These linkages may help explain  
69 mechanisms of tree mortality under drought or other stresses (Sevanto et al. 2014), yet a  
70 consensus on mortality mechanisms remains elusive (Wiley & Helliker 2012). Insect defoliation  
71 is a periodic stressor of trees that is rarely brought to bear on ongoing discussions of carbon  
72 starvation or hydraulic limitation hypotheses (Anderegg & Callaway 2012, Landhäusser &  
73 Lieffers 2012). Yet defoliation stress is relatively straightforward: it directly limits the main

## Foster J.R. GROWTH AND MORTALITY RESPONSE TO DEFOLIATION

74 source of C during a critical growing period. A better understanding of functional differences in  
75 tree response to defoliation would provide insight into responses to distinct climate-related  
76 stresses such as drought or late frost.

77       Extensive research quantifies growth and mortality responses to defoliation, yet it  
78 remains difficult to generalize the results across species and ecosystems due to the wide variety  
79 of data, models, and scales used by individual studies (Feicht et al. 1993, Hallet et al. 2006).  
80 These disparities present a significant obstacle to the development of general models that  
81 simulate how defoliation affects forest productivity. While extensive reviews exist for general  
82 (Kulman 1971) and species-specific defoliation effects (Davidson et al. 1999; Jacquet et al.  
83 2012), they stop short of quantitatively synthesizing results to compare defoliator systems (but  
84 see MacLean 1980). Comparisons are complicated by the common use of categorical measures  
85 of defoliation that differ. These measures may be defined by quantitative limits (e.g. low,  
86 medium, and high defoliation classes may correspond to 0-30%, 30-60%, 60-100% defoliation,  
87 or other limits), but they are typically reported and discussed categorically. These limitations  
88 leave a gap in our understanding about forest response to large-scale, recurring insect disturbance  
89 that contributes significant uncertainty to landscape- and global vegetation models.

90       We can reduce uncertainty in forest models by quantifying the different ways species  
91 respond to stress and how those responses are linked to functional traits. We can also improve  
92 how observations from field-based studies are scaled to geographic extents that are compatible  
93 with vegetation models. Recent innovations using satellite data to quantify and map defoliation  
94 create the potential to link spatially accurate estimates of disturbance stress with forest  
95 characteristics and response (Townsend et al. 2012, Foster et al. 2013). In order to improve forest  
96 models with realistic representations of defoliation severity, we need numerical relationships that

## Foster J.R. GROWTH AND MORTALITY RESPONSE TO DEFOLIATION

97 link accumulated defoliation stress to growth suppression or mortality. Examples of such  
98 empirical relationships exist for few defoliator systems (MacLean 1980; Alfaro et al. 1982). In  
99 this analysis, I compare defoliation responses among several species from different tree  
100 functional groups. I converted published data to standardized variables that lend themselves to  
101 stand- and landscape-scale forest models and examined the data for significant trends,  
102 relationships and differences among defoliator systems. Specifically, I sought studies that allow  
103 quantification of both accumulated defoliation stress, which I define in a manner similar to  
104 MacLean (1980) as the sum of annual defoliation over multiple years of an outbreak, and the  
105 associated responses in terms of growth and mortality. I expected sensitivity to defoliation to  
106 differ both by species and by functional groups defined by general tree-growth strategies.

107

### 108 **Materials and methods**

109 To test for generalizable relationships, I compiled research papers that reported defoliation as a  
110 percentage of whole canopy foliage, or alternatively cumulative defoliation (defined as the sum  
111 of annual defoliation over an outbreak or the product of average defoliation and outbreak  
112 duration), as well as changes in growth and mortality as percentages (growth = % of average or  
113 expected growth, cumulative mortality = % of population dying over a period of time, typically  
114 5-10 years). Because repeated defoliation causes cumulative stress in trees, data from multiple  
115 years of defoliation are of particular interest when modeling long-term effects (Blaise 1958;  
116 MacLean 1980; Colbert & Fekedulegn 2001; Hennigar, MacLean & Norfolk 2007). Increasing  
117 intensity over the duration of an outbreak can be captured by the summed, cumulative defoliation  
118 in an objective, quantitative way (MacLean & Ostaff 1989). For papers where data were  
119 presented in tables, graphs or text that could be converted to the described variables, I extracted,

## Foster J.R. GROWTH AND MORTALITY RESPONSE TO DEFOLIATION

120 transformed and analyzed them in a consistent manner. I assigned categorical annual or  
121 cumulative defoliation values to the numerical midpoint of the reported defoliation range (e.g. a  
122 150-300% cumulative defoliation category, became 225% defoliation) (MacLean & Lidstone  
123 1982). I treated the spruce budworm system (SBW) (*Choristoneura fumiferana*) as a special case  
124 because cumulative defoliation is defined uniquely in this literature as an index of defoliation by  
125 foliage age-classes. To retain comparison with existing published relationships, I did not rescale  
126 these data to fit my definition of cumulative “total” canopy defoliation (e.g. simultaneous  
127 defoliation of all foliage age-classes).

128 I selected results that reported the aggregate response of all tree canopy classes when  
129 available, as many forest models do not track individual trees or their canopy status (Mladenoff  
130 2004). When data were only reported for separate canopy classes (i.e. suppressed, intermediate,  
131 or dominant) and sample sizes were available, I used weighted averages of all classes to estimate  
132 aggregate stand response (Campbell & Valentine 1972). I did not distinguish among differences  
133 in growth or mortality variables, such as mortality expressed as a percentage of basal area (BA)  
134 or number of stems. My goal was to determine if average trends could be found in the extensive  
135 empirical literature and whether trends would vary among tree species groups. I expected  
136 considerable variability in both the predictor and response variables across studies, as the  
137 methods of their estimation often lacked precision. Many papers only reported means of  
138 cumulative defoliation categories, and relationships fit to mean values mask the variability  
139 present in the raw, unreported data. The  $R^2$  values reported from mean-only data do not represent  
140 the variability expected from plot-level data, which would presumably result in lower  $R^2$ .

141 I fit mortality response (%) to cumulative defoliation using a log transform to linearize  
142 the relationship. I fit either linear or negative log-linear relationships between cumulative

## Foster J.R. GROWTH AND MORTALITY RESPONSE TO DEFOLIATION

143 defoliation and growth (%) where appropriate. I report parameters and results in tables and back-  
144 transformed models in figures with the raw data. When possible, I also fit models to annual  
145 mortality rates, calculated by dividing raw reported mortality by the number of years over which  
146 it had accumulated. When multiple datasets for similar species or defoliator systems existed, I  
147 used mixed models (nlme package in R) to create combined models for annual rates that varied  
148 intercept and slope as random effects by study and compared the results using Akaike  
149 information criterion for small sample sizes (AICc).

150

### 151 **Results**

#### 152 *Growth Response*

153 Average radial growth decreased linearly with accumulated defoliation stress for 9 of 16 data  
154 sets that reported usable data, and followed a negative exponential relationship for the remainder  
155 (Table 1, Figs. 1 and 2). Cumulative defoliation explained from 17 to 99% of the variance in  
156 relative growth depending on the dataset, with typical  $R^2$  values exceeding 0.80 (Table 1). The  
157 rate of growth suppression, i.e., the slope parameter, tended to vary bimodally. More sensitive  
158 tree species-defoliator systems exhibited a negative slope equal to a 50-100% suppression in  
159 growth for a 100% increase in cumulative defoliation (Fig. 2a) (Kulman, Hodson & Duncan  
160 1963; Alfaro & Shepherd 1991; Gross 1992; Erdle & MacLean 1999), while growth of other  
161 species was reduced by only 5-20% over the same defoliation range (Figs. 1, 2 and 3, Table 1,  
162 Appendix S1 in Supporting Information) (Baker 1941; Rose 1958; Rubtsov 1996; Colbert &  
163 Fekedulegn 2001; Naidoo & Lechowicz 2001). Conifers including *Abies balsamea*, *Pinus*  
164 *banksiana*, *P. pinaster*, *P. sylvestrus*, *Psuedotsuga menziesii*, *Larix laricina*, and diffuse-porous  
165 *Populus* and *Acer* species composed the more responsive group, showing immediate, strong



## Foster J.R. GROWTH AND MORTALITY RESPONSE TO DEFOLIATION

166 responses to a single year of defoliation. Species with slower, more moderate growth response  
167 generated some radial growth even under severe defoliation, a trait characteristic of ring-porous  
168 *Quercus* species, which have positive minimum growth thresholds due to their need to grow new  
169 functional xylem cells every spring (Fig. 1). Trees with growth falling below these thresholds  
170 would presumably reach a point from which they are unable to recover and subsequently leave  
171 the pool of survivors. The lone deciduous conifer, *L. laricina*, responded less rapidly than *Pinus*  
172 species, reducing growth at rates intermediate between examples of *P. tremuloides* and juvenile  
173 *A. saccharum* (Appendix S1).

174         Negative curvilinear growth responses to defoliation were mostly associated with  
175 immature trees (Fig. 2). These showed rapid early reductions in growth that were later  
176 constrained by the theoretical minimum of zero (radial wood growth cannot be negative, though  
177 stems will shrink under certain conditions (Stephens, Turner & Roo 1972; Wargo 1981; Alfaro et  
178 al. 1982; Nichols 1988; Ostaff & Maclean 1995; MacLean & MacKinnon 1996)). The  
179 curvilinear response is plausible in species that can survive many years without measurable  
180 radial growth. Moreover, linear patterns become curvilinear if they approach lower bounds to  
181 growth, and may simply represent a truncated view of the full relationship. This appears to be the  
182 case for juvenile oaks that were manually defoliated by Wargo (1981) (Fig. 2a), whose growth  
183 decreased more rapidly in a curvilinear fashion than mature, naturally defoliated oaks (Fig. 1).  
184 Manually defoliated young *L. laricina* showed a similar curvilinear response (Fig. 2a). These  
185 three patterns dominate the literature: negative curvilinear or linear growth responses with steep  
186 or gradual slopes. This suggests consistent differences in the variability and range of growth  
187 suppression among tree functional groups following defoliation stress.

188

## Foster J.R. GROWTH AND MORTALITY RESPONSE TO DEFOLIATION

### 189 *Mortality*

190 I derived standardized cumulative defoliation and mortality data for 12 published studies  
191 covering broad areas of North American and Eurasian temperate forest, several tree species, and  
192 seven distinct spring defoliators of hardwoods, conifers or both (Table 2). Mortality increased  
193 exponentially in all examples, approaching a sigmoid curve if severe enough, or observed long  
194 enough, to saturate at 100% (MacLean 1980). This pattern was first observed by Blaise (1958)  
195 for *Abies balsamea* mortality following spruce budworm defoliation (Appendix S2). Though the  
196 available data show a consistent form for mortality relationships, the parameters varied for  
197 different tree species and defoliator systems (Fig. 3, Table 2, Appendix S2 and S3). Cumulative  
198 defoliation explained 90% of the variation in cumulative mortality of *Quercus* dominated forests  
199 following *Lymantria dispar* L. (gypsy moth (GM)) outbreaks (Table 2, Feicht et al. 1993).  
200 Mortality increased slowly at first, until cumulative defoliation reached about 150%, after which  
201 mortality increased rapidly, approaching 100% (Baker 1941; Campbell & Valentine 1972; Feicht  
202 et al. 1993; MacLean & Ebert 1999). A similar exponential increase was observed for single year  
203 defoliation levels less than or equal to 100% (Table 2, Dobbertin & Brang 2005).

204 Alfaro et al. (1982) used a powered exponential relationship to explain over 99% of the  
205 variance in mortality of Douglas fir (*Pseudotsuga mensiesii*) following a *Choristoneura*  
206 *occidentalis* (western spruce budworm (WSBW)) outbreak (Table 2, Appendix S2). This  
207 relationship is very similar to one derived here for *Abies balsamea* (balsam fir) mortality  
208 following *Choristoneura fumiferana* (eastern spruce budworm (SBW)) defoliation from two  
209 separate studies (Table 2, Fig. 3) (Blais 1958; Batzer 1973). These data agree with anecdotal  
210 reports of mortality becoming severe following 3-4 years of complete defoliation (Kulman  
211 1971), though these systems take much longer than deciduous ones to reach an equivalent

## Foster J.R. GROWTH AND MORTALITY RESPONSE TO DEFOLIATION

212 amount of whole canopy defoliation (as opposed to defoliation of specific foliage age-classes  
213 only). In particular, SBW outbreaks on *A. balsamea* take 10-12 years to produce equivalent  
214 damage to entire canopies because they feed preferentially on current year foliage (MacLean  
215 1980; MacLean & Ostaff 1989). Mortality in *A. balsamea* following *Lambdina fiscellaria*  
216 *fiscellaria* (hemlock looper), a defoliator of all foliage age-classes, led to a more rapid increase  
217 in mortality, closer to the range observed for *Pinus* species (Table 2, Appendix S2) (MacLean &  
218 Ebert 1999).

219         When data from three studies of *Pinus* response, including mortality of young *P. strobus*  
220 following GM defoliation and mature *P. banksiana* following *Choristoneura pinus pinus* (jack  
221 pine budworm (JPBW)) defoliation (Baker 1941; Kulman et al. 1963) were combined (Fig. 3),  
222 the best fit model shows mortality increasing more rapidly for defoliated *Pinus* than *Quercus*  
223 species (Fig. 3, Appendix S2 and S3). Pines are typically thought to be capable of withstanding  
224 only a few years of complete or severe defoliation, consistent with this rapid increase in  
225 mortality (O'Neil 1962; Volney 1998).

226

### 227 *Differences in response models: species vs. functional group*

228 For cases where it was possible to formally compare mixed models (Appendix S3), models with  
229 species-specific parameters always ranked higher than models that varied random effects based  
230 on functional group. Species-specific random effects were best for all response models  
231 regardless of whether intercepts, slopes, or both were varied (Appendix S3). Though species-  
232 specific models represented the data best, functional group models lost little in terms of  
233 goodness-of-fit. The variance explained by the best curvilinear growth response model by  
234 functional group ( $R^2_c = 0.72$ ) was not much lower than variance explained by the best species

## Foster J.R. GROWTH AND MORTALITY RESPONSE TO DEFOLIATION

235 model ( $R^2c=0.83$ ) (Appendix S3) (Nakagawa & Schielzeth 2013). Variance explained by the best  
236 linear growth response models was similarly high for functional group ( $R^2c=0.92$ ) as for species  
237 ( $R^2c=0.94$ ), and the best mortality functional group model ( $R^2c=0.82$ ) lost little predictive power  
238 compared to the best species model ( $R^2c=0.87$ ). The similar predictive power of species and  
239 functional group models suggests that functional group can be used as a surrogate to predict  
240 growth and mortality response for tree species that lack data. It should be noted that mixed  
241 models that vary only intercepts (*Quercus*, *Pinus*, Appendix S3) may be detecting differences  
242 among the methods used by different studies to relativize growth responses against “normal”  
243 growth, rather than meaningful biological differences among species.

244

### 245 **Discussion**

246 *Relationship of growth and mortality responses to phenology, wood anatomy and NSC storage*  
247 Differences in growth strategies and wood anatomy among tree functional groups may help  
248 explain the observed differences in shape and slope of the relationships reported here. For  
249 example, oaks that survive several years of gypsy moth defoliation show a linear reduction in  
250 growth of about 14-17% per 100% increase in defoliation. The best mixed models showed that  
251 slopes did not differ significantly for analogous data collected in New England, Quebec, and  
252 Russia (Baker 1941; Rubtsov 1996; Naidoo & Lechowicz 2001) (Appendix S3). Over the course  
253 of an outbreak, radial growth was reduced by an average of 50-60% in these examples, but rarely  
254 more. Temperate oaks are ring-porous species that must rely on large early wood vessels for  
255 hydraulic transport. More than 90% of these vessels cavitate under freezing winter temperatures,  
256 meaning that oaks’ hydraulic architecture will not function from one year to the next (Sperry et  
257 al. 1994; Davis, Sperry & Hacke 1999). Temperate oaks overcome this limitation by storing

## Foster J.R. GROWTH AND MORTALITY RESPONSE TO DEFOLIATION

258 excess starch reserves in sapwood over winter and drawing on them to build new xylem elements  
259 the following spring (Barbaroux & Breda 2002). This early wood radial growth will actually  
260 precede flushing of the leaves by two to six weeks, and is necessary to supply water to  
261 developing foliage (Lechowicz 1984; Hacke & Sauter 1996; Suzuki, Yoda & Suzuki 1996,  
262 Michelot et al. 2012). Accordingly, many *Quercus* species, and large vessel ring-porous species  
263 in general, leaf-out later than other deciduous species (Lechowicz 1984, Panchen et al. 2014).  
264 Growth phenology research using dendrometer bands has documented examples where 30% of  
265 radial growth is completed before budburst, and 40% by the time tree canopies achieve  
266 maximum LAI in June (Kulman et al. 1963; Hinckley & Lassoie 1981; Barbaroux & Breda  
267 2002, Zweifel et al. 2006). Similarly, 50% of the total annual xylem was formed by June for  
268 *Fraxinus excelsior*, another ring-porous species (Ladefoged 1952). As a consequence of these  
269 traits, by the time larvae of spring defoliators are large enough to cause severe defoliation  
270 damage, many oaks have already completed 30-40% of annual radial growth in the form of early  
271 wood (Kozlowski 1969, Zweifel et al. 2006).

272 Xylem vessels are necessary for conductance to support leaves and photosynthesis,  
273 creating a minimum cambial growth threshold for temperate, deciduous oaks that is typically 20-  
274 40% of average radial growth. The curvilinear growth response of juvenile *Quercus* trees  
275 defoliated by Wargo (1981) illustrates this well (Fig. 2a). Trees that are depleted of starch and  
276 unable to regenerate a minimum vessel layer the following spring are likely to die and leave the  
277 survivor pool. Studies of non-structural carbohydrate (NSC) storage also support this hypothesis,  
278 though the mechanisms of the carbon starvation hypothesis remain in question (Hoch, Richter &  
279 Korner 2003; Landhäusser & Lieffers 2012). Hoch et al. (2003) measured NSC allocation and  
280 reserves for seven deciduous and three evergreen tree species and estimated that typical C

## Foster J.R. GROWTH AND MORTALITY RESPONSE TO DEFOLIATION

281 reserves in deciduous species could regenerate the equivalent of four canopies of foliage. This  
282 estimate agrees with anecdotal evidence that many trees die following three to four years of  
283 complete defoliation and is consistent with curvilinear mortality rates (Fig. 3, Appendix S2).  
284 Wargo (1981) measured starch reserves in juvenile *Q. velutina* and *Q. alba* as well as *Acer*  
285 *saccharum* following three years of 100% artificial defoliation of June foliage. Starch dropped  
286 curvilinearly to 11% and 0.2 % of average in *Q. alba* and *Q. velutina*, respectively. Starch in *A.*  
287 *saccharum* dropped to 0%, leading to complete mortality. Diffuse-porous species such as *A.*  
288 *saccharum* are less sensitive to limited radial growth. They retain multiple rings of functioning  
289 xylem to meet hydraulic requirements. They may be more sensitive to rapid reductions in starch,  
290 as they are less thrifty with NSC storage than *Quercus* species (Wargo 1981; Barbaroux & Breda  
291 2002).

292 Diffuse-porous tree species from genera such as *Populus* (aspen), *Acer* (maples), and  
293 *Fagus* (beech) demonstrate a different growth phenology than oaks. This phenology could  
294 explain their wider range of radial growth response to defoliation. The smaller vessels in diffuse-  
295 porous wood rarely cavitate and water transport is thus possible using existing xylem as soon as  
296 spring conditions are suitable for budburst and shoot elongation (Lechowicz 1984; Davis et al.  
297 1999). Diffuse-porous species typically utilize multiple annual rings for proper hydraulic  
298 function. As a result, diffuse-porous species store less starch in sapwood, only needing enough to  
299 generate a new set of foliage. These species leaf-out as early as possible when growing  
300 conditions become suitable for early leaf development (Panchen et al. 2014), and the probability  
301 of late frosts decreases (Barbaroux & Breda 2002). Diffuse-porous wood anatomy is often linked  
302 to indeterminate growth habits, which allow species to continue to grow and respond to changing  
303 conditions throughout the growing season (Kozłowski 1992). In comparison to ring-porous

## Foster J.R. GROWTH AND MORTALITY RESPONSE TO DEFOLIATION

304 *Quercus*, diffuse-porous *Fagus* leaf-out earlier in the spring, do not initiate measurable radial  
305 growth until two to seven weeks after budburst has occurred, and may achieve only 5-10% of  
306 annual growth by the time canopies reach maximum LAI (Suzuki et al. 1996; Schmitt, Moller &  
307 Eckstein 2000; Barbaroux & Breda 2002, Michelot et al. 2012)). In such cases, June herbivory  
308 by defoliator larvae could suppress radial growth by up to 95%. The wider range in growth  
309 response of diffuse-porous species leads to a steeper negative slope as defoliation stress  
310 accumulates. At the same time, these strategies may improve survivability for some diffuse-  
311 porous species, such as *Populus tremuloides*, by allowing trees to dedicate more available  
312 photosynthate and NSC reserves to refoliation or chemical defense, rather than replenishing  
313 reserves for future spring wood growth. The empirical evidence in the literature remains  
314 equivocal on this topic. This review shows that defoliated young *A. saccharum* and mature *P.*  
315 *tremuloides* do demonstrate a wider range in radial growth suppression than *Quercus* species  
316 (Fig. 2); their growth was suppressed to below 20% of average over the observed range of  
317 defoliation.

318 Conifers that retain foliage for multiple years employ yet another growth strategy that  
319 contributes to a wider dynamic range of response to cumulative defoliation stress. Conifers that  
320 retain two to three years of foliage (most *Pinus*) respond differently from those that retain four to  
321 eight years of foliage age-classes (*Abies*, *Pseudotsuga*), as pines are generally more vulnerable to  
322 their defoliators than firs. Conductive tissue in coniferous stemwood is made up of tracheids that  
323 resist cavitation, a necessity for retention of green leaves throughout the winter dormant season  
324 (Hinckley & Lassoie 1981; Tyree & Ewers 1991). Like diffuse-porous species, conifers are not  
325 dependent on radial growth to renew xylem function and can survive periods with no radial  
326 growth. This characteristic shows up as dropped rings in dendrochronological research. Unlike

## Foster J.R. GROWTH AND MORTALITY RESPONSE TO DEFOLIATION

327 deciduous trees, conifers tend to utilize older foliage more than sapwood for NSC storage, and  
328 rely on translocation from those stores to grow new foliage in the spring (Kozlowski 1992; Hoch  
329 et al. 2003). New, current-year foliage is also responsible for a greater proportion of net  
330 photosynthate production than older foliage. These characteristics mean radial growth response  
331 to defoliation can range from 0-100%, and variation in preferential herbivory of old or new  
332 foliage can produce linear or nonlinear relationships (Fig. 2b).

333         The simple, general relationships compiled here indicate that increasing defoliation stress  
334 slows carbon accumulation in host species through destruction of foliar biomass and suppression  
335 of radial stem growth. Productivity can be slowed at different rates, depending on the plasticity  
336 and phenology of tree growth response and defoliator characteristics. Continuous defoliation also  
337 increases tree mortality exponentially. Mortality rates increase most rapidly in *Pinus*, followed  
338 by diffuse-porous genera such as *Acer* and *Populus*, then *Quercus*, and more slowly in *Abies* and  
339 *Pseudotsuga* whose pests exhibit different feeding behavior. Nonlinear growth and mortality  
340 responses can lead to extreme short-term losses in aboveground carbon. These relationships  
341 allow us to more accurately quantify and model landscape-level effects on forest carbon  
342 accumulation. This framework and approach for quantifying the accumulation of defoliation  
343 stress and associated growth and mortality responses can be used in future empirical research to  
344 facilitate comparison across more defoliator systems.

345

### 346 **Acknowledgements**

347 Funding support was provided by NASA Carbon Cycle Science grant NNX06AD45G and  
348 NASA earth system science graduate fellowship (NNX08AU93H). I thank David Mladenoff for



## Foster J.R. GROWTH AND MORTALITY RESPONSE TO DEFOLIATION

349 guidance, support and editorial review, as well as B. Sturtevant, K. Raffa, M. Turner, P.  
350 Townsend, D. Lorimer, and A. Pessin for comments on early versions of this manuscript.

351

### 352 **Data Accessibility**

353 - Defoliation, growth and mortality data extracted and transformed from published studies  
354 will be archived on DRYAD, as well as associated R-scripts allowing replication of the  
355 analysis.

356 - Appendix S1. Plots of derived growth data and back-transformed model fits by study:  
357 uploaded as online supporting information

358 - Appendix S2. Plots of derived mortality data and back-transformed model fits by study:  
359 uploaded as online supporting information

360 - Appendix S3. Model selection and parameter fits for mixed models of growth and  
361 mortality data that could be compared within defoliator systems or across species groups:  
362 uploaded as online supporting information

363

### 364 **References**

365 Alfaro RI, Shepherd RF (1991) Tree-ring growth of interior douglas-fir after one year defoliation  
366 by douglas-fir tussock moth. For Sci 37:959-964.

367 Alfaro RI, Vansickle GA, Thomson AJ, Wegwitz E (1982) Tree mortality and radial growth  
368 losses caused by the western spruce budworm in a douglas-fir stand in British Columbia. Can J  
369 For Res 12:780-787.

Foster J.R. GROWTH AND MORTALITY RESPONSE TO DEFOLIATION

- 370 Anderegg WRL, Callaway ES (2012) Infestation and hydraulic consequences of induced carbon  
371 starvation. *Plant Physiology* 159:1866-1874.
- 372 Baker WL (1941) Effect of gypsy moth defoliation on certain forest trees. *J For* 39:1017-1022.
- 373 Barbaroux C, Breda N (2002) Constrasting distribution and seasonal dynamics of carbohydrate  
374 reserves in stem wood of adult ring-porous sessile oak and diffuse-porous beech trees. *Tree*  
375 *Physiol* 22:1201-1210.
- 376 Batzer HO (1973) Net effect of spruce budworm defoliation on mortality and growth of balsam  
377 fir. *J For* 71:34-37.
- 378 Blaise JR (1958) The vulnerability of balsam fir to spruce budworm attack in northern Ontario,  
379 with special reference to physiological age of the tree. *For Chron* 34:405-422.
- 380 Campbell RW, Valentine HT (1972) Tree condition and mortality following defoliation by the  
381 gypsy moth. U.S. Department of Agriculture, Forest Service, Northeastern Forest Experiment  
382 Station, Upper Darby, PA, Res. Pap. NE-236.
- 383 Churchill GB, John HH, Duncan DP, Hodson AC (1964) Long-term effects of defoliation on  
384 aspen by the forest tent caterpillar. *Ecology* 45:630-636.
- 385 Colbert JJ, Fekedulegn D (2001) Effects of gypsy moth defoliation on tree growth - preliminary  
386 models for effects of cumulative defoliation on individual host tree radial increment.  
387 *Proceedings: integrated management and dynamics of forest defoliating insects, Victoria, BC.,*  
388 U.S. Department of Agriculture, Forest Service, Northeastern Research Station

Foster J.R. GROWTH AND MORTALITY RESPONSE TO DEFOLIATION

- 389 Davidson CB, Gottschalk KW, Johnson JE (1999) Tree mortality following defoliation by the  
390 European gypsy moth (*Lymantria dispar* L.) in the United States: a review. For Sci 45:74-84.
- 391 Davis SD, Sperry JS, Hacke UG (1999) The relationship between xylem conduit diameter and  
392 cavitation caused by freezing. A J Bot 86:1367-1372.
- 393 Dobesberger EJ (1998) Stochastic simulation of growth loss in thinned balsam fir stands  
394 defoliated by the spruce budworm in Newfoundland. Can J For Res 28:703-710.
- 395 Feicht DL, Sandra LC (1993) Forest stand conditions after 13 years of gypsy moth infestation.  
396 Proceedings of the 9th Central Hardwood Forest Conference; Gen. Tech. Rep. NC-161, St. Paul,  
397 MN, U.S. Department of Agriculture, Forest Service, North Central Forest Experiment Station.
- 398 Foster JR, Townsend PA, DJ Mladenoff (2013). Spatial dynamics of a gypsy moth defoliation  
399 outbreak and dependence on habitat characteristics. Landscape Ecol 28:1307-1320.
- 400 Gross HL (1992) Impact analysis for a jack pine budworm infestation in Ontario. Can J For Res  
401 22:818-831.
- 402 Hacke U, Sauter JJ (1996) Xylem dysfunction during winter and recovery of hydraulic  
403 conductivity in diffuse-porous and ring-porous trees. Oecologia 105:435-439
- 404 Hallett RA, Bailey SW, Horsley SB, Long RP (2006) Influence of nutrition and stress on sugar  
405 maple at a regional scale. Can J For Res 36:2235-2246.
- 406 Hennigar CR, MacLean DA, Norfolk CJ (2007) Effects of gypsy moth defoliation on softwood  
407 and hardwood growth and mortality in New Brunswick, Canada. Northern J Appl For 24:138-  
408 145.

Foster J.R. GROWTH AND MORTALITY RESPONSE TO DEFOLIATION

- 409 Herrick OW, Gansner DA (1987) Gypsy moth on a new frontier: forest tree defoliation and  
410 mortality. Northern J Appl For 4:128-133.
- 411 Hinckley TM, Lassoie JP (1981) Radial growth in conifers and deciduous trees: a comparison.  
412 Mitteilungen der Forstlichen Bundes Versuchsanstalt Wien 142:17-56
- 413 Hoch G, Richter A, Korner C (2003) Non-structural carbon compounds in temperate forest trees.  
414 Plant Cell Environ 26:1067-1081.
- 415 Ives WG, Nairn LD (1966) Effects of defoliation on young upland tamarack in Mantioba. For  
416 Chron 42:137-142.
- 417 Jacquet J, Orazio C, Jactel H (2012) Defoliation by processionary moth significantly reduces tree  
418 growth: a quantitative review. Ann For Sci 69:857-866.
- 419 Jacquet J, Bosc A, O'Grady AP, Jactel H (2013) Pine growth response to processionary moth  
420 defoliation across a 40-year chronosequence. For Ecol Manage 293:29-38.
- 421 Kozlowski TT (1969) Tree physiology and forest pests. J For 67:118-123.
- 422 Kozlowski TT (1992) Carbohydrate sources and sinks in woody plants. Bot Rev 58:107-222.
- 423 Kulman HM, Hodson AC, Duncan DP (1963) For Sci 9:146-157.
- 424 Kulman HM (1971) Effects of insect defoliation on growth and mortality of trees. Annu Rev  
425 Entomol 16:289-324.
- 426 Ladefoged K (1952) The periodicity of wood formation. Danske Videnskabernes Selskab.  
427 Biologiske skrifter. bd. 7. no. 3. København : Ejnar Munksgaard.

Foster J.R. GROWTH AND MORTALITY RESPONSE TO DEFOLIATION

- 428 Landhaeusser SM, Lieffers VJ (2012) Defoliation increases risk of carbon starvation in root  
429 systems of mature aspen. *Trees Struc Func* 26:653-661.
- 430 Lechowicz MJ (1984) Why do temperate deciduous trees leaf out at different times – adaptation  
431 and ecology of forest communities. *Am Nat* 124:821-842.
- 432 Landhäusser SM, Lieffers VJ (2012) Defoliation increases risk of carbon starvation in root  
433 systems of mature aspen. *Trees* 26:653-661.
- 434 Lyytikäinen-Saarenmaa P, Tomppo E (2002) Impact of sawfly defoliation on growth of Scots  
435 pine *Pinus sylvestris* (Pinaceae) and associated economic losses. *Bull Entomol Res* 92:137-140.
- 436 MacLean DA (1980) Vulnerability of spruce stands during uncontrolled spruce budworm  
437 outbreaks – a review and discussion. *For Chron* 56:213-221.
- 438 MacLean DA, Ebert P (1999) The impact of hemlock looper (*Lambdina fischerllaria fischerllaria*  
439 (Guen.)) on balsam fir and spruce in New Brunswick, Canada. *For Ecol Manage* 120:77-87.
- 440 MacLean DA, Lidstone RG (1982) Defoliation by spruce budworm: estimation by ocular and  
441 shoot-count methods and variability among branches, trees, and stands. *Can J For Res* 12:582-  
442 594.
- 443 MacLean DA, MacKinnon WE (1996) Accuracy of aerial sketch-mapping estimates of spruce  
444 budworm defoliation in New Brunswick. *Can J For Res* 26:2099-2108.
- 445 MacLean DA, Ostaff DP (1989) Patterns of balsam fir mortality caused by an uncontrolled  
446 spruce budworm outbreak. *Can J For Res* 19:1087-1095.

Foster J.R. GROWTH AND MORTALITY RESPONSE TO DEFOLIATION

- 447 Man R, Kayahara GJ, Rice JA, MacDonald GB (2008) Response of trembling aspen to partial  
448 cutting and subsequent forest tent caterpillar defoliation in a boreal mixedwood stand in  
449 northeaster Ontario, Canada. *Can J For Res* 38:1349-1356.
- 450 Michelot A, Simard S, Rathgeber C, Dufrene E, Damesin C (2012) Comparing the intra-annual  
451 wood formation of three European species (*Fagus sylvatica*, *Quercus petraea* and *Pinus*  
452 *sylvestris*) as related to leaf phenology and non-structural carbohydrate dynamics. *Tree Phys* 32:  
453 1033-1043.
- 454 Mladenoff DJ (2004) LANDIS and forest landscape models. *Ecol Modell* 180:7-19.
- 455 Naidoo R, Lechowicz MJ (2001) Effects of gypsy moth on radial growth of deciduous trees. *For*  
456 *Sci* 47:338-348.
- 457 Nakagawa S, Schielzeth H (2013) A general and simple method for obtaining  $R^2$  from  
458 generalized linear mixed-effects models. *Method Ecol Evol* 4:133-142.
- 459 O'Neil LC (1962) Some effects of artificial defoliation on the growth of jack pine (*Pinus*  
460 *banksiana* Lamb.). *Can J Bot* 40:273-280.
- 461 Ostaff DP, Maclean DA (1995) Patterns of balsam fir foliar production and growth in relation to  
462 defoliation by spruce budworm. *Can J For Res* 25:1128-1136.
- 463 Panchen ZA, Primack RB, Nordt B, Ellwood ER, Stevens A, Renner SS, Willis CG, Fahey R,  
464 Whittemore A, Du Y, Davis CC (2014) Leaf out times of temperate woody plants are related to  
465 phylogeny, deciduousness, growth habit and wood anatomy. *New Phytol* 203:1208-1219.

Foster J.R. GROWTH AND MORTALITY RESPONSE TO DEFOLIATION

- 466 Reichenbacker RR, Schultz RC, Hart ER (1996) Artificial defoliation effect on *Populus* growth,  
467 biomass production, and total nonstructural carbohydrate concentration. *Popul Ecol* 25:632-642.
- 468 Rose AH (1958) The effect of defoliation on foliage production and radial growth of quaking  
469 aspen. *For Sci* 4:335-342.
- 470 Salemaa M, Jukola-Sulonen E (1990) Vitality rating of *Picea abies* by defoliation class and other  
471 vigour indicators. *Scand J Forest Res* 5:413-426.
- 472 Simmons MJ, Lee TD, Ducey MJ, Elkinton JS, Boettner GH, Dodds KJ (2014) Effects of  
473 invasive winter moth defoliation on tree radial growth in eastern Massachusetts, USA. *Insects*  
474 5:301-318.
- 475 Schmitt U, Moller R, Eckstein D (2000) Seasonal wood formation dynamics of beech (*Fagus*  
476 *sylvatica* L.) and black locust (*Robinia pseudoacacia* L.) as determined by the “pinning”  
477 technique. *J Appl Bot-Angew Bot* 74:10-16.
- 478 Sevanto S, McDowell NG, Dickman LT, Pangle R, Pockman WT (2014) How do trees die? A  
479 test of the hydraulic failure and carbon starvation hypotheses. *Plant Cell Environ* 37:153-161.
- 480 Sperry JS, Nichols KL, Sullivan JEM, Eastlack SE (1994) Xylem embolism in ring-porous,  
481 diffuse-porous, and coniferous trees of northern Utah and interior Alaska. *Ecology* 75:1736-  
482 1752.
- 483 Stephens GR, Turner NC, De Roo HC (1972) Notes: Some effects of defoliation by gypsy moth  
484 (*Porthetria dispar* L.) and elm spanworm (*Ennomos subsignarius* Hbn.) on water balance and  
485 growth of deciduous forest trees. *For Sci* 18:326-330.

Foster J.R. GROWTH AND MORTALITY RESPONSE TO DEFOLIATION

- 486 Suzuki M, Yoda K, Suzuki H (1996) Phenological comparison of the onset of vessel formation  
487 between ring-porous and diffuse-porous deciduous trees in a Japanese temperate forest. *Iawa*  
488 *J17*:431-444.
- 489 Townsend PA, Singh A, Foster JR et al (2012) A general Landsat model to predict canopy  
490 defoliation in broadleaf deciduous forests. *Remote Sens Environ* 119: 225-265.
- 491 Tyree MT, Ewers FW (1991) The hydraulic architecture of trees and other woody-plants. *New*  
492 *Phytol* 119:345-360.
- 493 Volney WJA (1998) Ten-year tree mortality following a jack pine outbreak in Saskatchewan.  
494 *Can J For Res* 28:1784-1793.
- 495 Wiley E, Helliker B (2012) A re-evaluation of carbon storage in trees lends greater support for  
496 carbon limitation to growth. *New Phytol* 195:285-289.
- 497 Williams DT, Straw NA, Day KR (2003) Defoliation of Sitka spruce by the European spruce  
498 sawfly, *Gilpinia hercyniae* (Hartig): a retrospective analysis using the needle trace method. *Agr*  
499 *Forest Entomol* 5:235-245.
- 500 Zweifel R, Zimmermann L, Zeugin F, Newbery DM (2006) Intra-annual radial growth and water  
501 relations of trees: implications towards a growth mechanism. *J Exp Botany* 57:1445-1459.  
502  
503



Foster J.R. GROWTH AND MORTALITY RESPONSE TO DEFOLIATION

504 **Figure Legends**

505

506 **Figure 1.** Growth response of *Quercus* species to *Lymantria dispar* (L.) (gypsy moth) defoliation  
507 including *Quercus robur* (Rubstov 1996), *Q. velutina* (Baker 1941), *Q. rubra* (Wargo 1981), and  
508 *Quercus alba* (Baker 1941, Wargo 1981). Lines show best fit mixed model (Appendix S3, Table  
509 S3-1). The best combined *Quercus* model varied intercepts but not slopes.

510

511 **Figure 2.** Growth decreases curvilinearly to defoliation (a.) in *Populus tremuloides* (Rose 1958),  
512 manually defoliated juvenile trees of *Acer saccharum*, *Q. alba*, and *Q. velutina* (Wargo 1981),  
513 and *Larix laricina* (Ives and Nairn 1966). Linear growth responses of coniferous species (b.)  
514 include steep declines in *Pinus banksiana*, *P. pinaster*, *P. sylvestrus* with slower declines in  
515 *Pseudotsuga menziesii*, *Picea abies*, and *Abies balsamea*. The best fit mixed model (a., lines)  
516 randomly varied slopes but not intercepts (Appendix S3, Table S3-1). Lines in (b.) show model  
517 fits from Table 1 and the best mixed model for *Pinus* species that varied intercept, but not slope  
518 (Appendix). *A. balsamea* relationship was published by Dobesberger 1998.

519

520 **Figure 3.** Cumulative mortality responses of example tree species to accumulated defoliation.  
521 Mortality rates rise most quickly in *Pinus* (Baker 1941, Kulman et al. 1963, Gross 1992),  
522 followed by diffuse-porous *Populus* (Mann et al. 2007), and then ring-porous *Quercus*  
523 dominated forests (Feicht et al. 1993). Mortality in *Abies* appears to rise more slowly (Blais  
524 1958, Batzer 1973), but defoliation in this system is defined differently as damage by foliage  
525 age-class. Lines show model fits from Table 2. All plots can be found in Appendix S2.

526

527

528 **Table 1.** Models of relative tree growth response to cumulative defoliation. Input data were extracted and relativized from original  
 529 studies to the same scale (details below).

| 531 | Location                                                                                                 | Cum Defo.†<br>532 Range (%)<br>533 (%) | Growth*<br>534 Var. | Equation | <i>b</i> | <i>m</i> | R <sup>2</sup> | Reference                             |
|-----|----------------------------------------------------------------------------------------------------------|----------------------------------------|---------------------|----------|----------|----------|----------------|---------------------------------------|
| 535 | <i>Lymantria dispar</i> (L.) defoliation of <i>Quercus robur</i>                                         |                                        |                     |          |          |          |                |                                       |
| 536 | Russia                                                                                                   | 0-300                                  | RW                  | $y=mx+b$ | 80.00    | -0.141   | 0.443          | Rubstov (1996), Fig. 3                |
| 538 | <i>Lymantria dispar</i> (L.) defoliation of <i>Q. coccinea</i> , <i>Q. alba</i> , and <i>Q. velutina</i> |                                        |                     |          |          |          |                |                                       |
| 539 | Maine                                                                                                    | 0-400                                  | Radial inc.         | $y=mx+b$ | 96.177   | -0.110   | 0.437          | Baker (1941), Table 5                 |
| 540 | Massachusetts                                                                                            |                                        |                     |          |          |          |                |                                       |
| 541 | New England                                                                                              | 0-800                                  | Radial inc.         | $y=mx+b$ | 70.553   | -0.039   | 0.935          | Baker (1941), Table 4                 |
| 542 |                                                                                                          |                                        |                     |          |          |          |                |                                       |
| 543 | <i>Lymantria dispar</i> (L.) defoliation of <i>Q. alba</i> , and <i>Q. rubra</i>                         |                                        |                     |          |          |          |                |                                       |
| 544 | New England                                                                                              | 0-185                                  | RW                  | $y=mx+b$ | 95.674   | -0.278   | 0.877          | Wargo (1981), Table 5.3               |
| 545 |                                                                                                          |                                        |                     |          |          |          |                |                                       |
| 546 | N. Temperate                                                                                             | 0-800                                  | all                 | $y=mx+b$ | 78.981   | -0.100   | 0.254          | Combined above                        |
| 547 |                                                                                                          |                                        |                     |          |          |          |                |                                       |
| 548 | Quebec                                                                                                   | NA                                     | RW                  | $y=mx+b$ | 83.2     | -0.165   | 0.730          | Naidoo & Lechowicz (2001), Figure 6‡  |
| 549 |                                                                                                          |                                        |                     |          |          |          |                |                                       |
| 550 | Pennsylvania                                                                                             | 0-170                                  | RW index            | $y=mx+b$ | 99.75    | -0.168   | 0.168          | Colbert & Fekedulegn (2001), Fig. 10‡ |
| 551 |                                                                                                          |                                        |                     |          |          |          |                |                                       |
| 552 | <i>Operophtera brumata</i> L. defoliation of <i>Q. rubra</i> and <i>Q. velutina</i>                      |                                        |                     |          |          |          |                |                                       |
| 553 | Massachusetts                                                                                            | 0-100                                  | RW index            | $y=mx+b$ | 120.2    | -0.60    | 0.24           | Simmons et al. (2014), Fig. 2‡        |
| 554 |                                                                                                          |                                        |                     |          |          |          |                |                                       |
| 555 |                                                                                                          |                                        |                     |          |          |          |                |                                       |
| 556 |                                                                                                          |                                        |                     |          |          |          |                |                                       |

Foster J.R. GROWTH AND MORTALITY RESPONSE TO DEFOLIATION

| 561 | Location                                                                                   | Cum. Growth*<br>Defo.† Var.<br>Range (%)<br>(%) | Equation    | <i>b</i> | <i>m</i> | R <sup>2</sup> | Reference                            |
|-----|--------------------------------------------------------------------------------------------|-------------------------------------------------|-------------|----------|----------|----------------|--------------------------------------|
| 565 | <i>Malacosoma disstria</i> (Hubn.) defoliation of <i>Populus tremuloides</i>               |                                                 |             |          |          |                |                                      |
| 566 | Ontario                                                                                    | 0-100 Radial inc.                               | $y=be^{mx}$ | 4.346    | -0.006¶  | 0.470          | Rose (1958), Fig. 4                  |
| 567 | Manual defoliation of juvenile <i>Populus deltoides</i> clones                             |                                                 |             |          |          |                |                                      |
| 568 | Iowa                                                                                       | 0-75 AGB inc.                                   | $y=mx+b$    | 103.38   | -0.442   | 0.613          | Reichenbacker et al. (1996), Table 3 |
| 569 | Manual defoliation of immature <i>Acer Saccharum</i>                                       |                                                 |             |          |          |                |                                      |
| 570 | Eastern US                                                                                 | 0-300 Radial inc.                               | $y=be^{mx}$ | 4.677    | -0.015   | 0.984          | Wargo (1981), Table 5-10c            |
| 571 | Manual defoliation of immature <i>Quercus alba</i>                                         |                                                 |             |          |          |                |                                      |
| 572 | Eastern US                                                                                 | 0-300 Radial inc.                               | $y=be^{mx}$ | 4.572    | -0.005   | 0.995          | Wargo (1981), Table 5-10b            |
| 573 | Manual defoliation of immature <i>Quercus velutina</i>                                     |                                                 |             |          |          |                |                                      |
| 574 | Eastern US                                                                                 | 0-300 Radial inc.                               | $y=be^{mx}$ | 4.382    | -0.004 § | 0.791          | Wargo (1981), Table 5-10a            |
| 575 | <i>Choristoneura pinus pinus</i> (Free) on <i>Pinus banksiana</i>                          |                                                 |             |          |          |                |                                      |
| 576 | N. America                                                                                 | 0-94 Summerwood                                 | $y=mx+b$    | 79.323   | -0.826   | 0.998          | Kulman et al. (1963), Table 4        |
| 577 | <i>Thaumetopoea pityocampa</i> (Dennis & Schiff) defoliation of <i>Pinus pinaster</i> Ait. |                                                 |             |          |          |                |                                      |
| 578 | France                                                                                     | 0-100 Radial inc.                               | $y=mx+b$    | 95.604   | -0.874   | 0.983          | Jacquet et al. (2013), Fig. 1        |
| 579 | <i>Diprion pini</i> (Linneaus) defoliation on <i>Pinus sylvestrus</i>                      |                                                 |             |          |          |                |                                      |

Foster J.R. GROWTH AND MORTALITY RESPONSE TO DEFOLIATION

|     |                                                                                      |       |             |             |        |         |       |                                            |
|-----|--------------------------------------------------------------------------------------|-------|-------------|-------------|--------|---------|-------|--------------------------------------------|
| 594 |                                                                                      |       |             |             |        |         |       |                                            |
| 595 | Finland                                                                              | 0-100 | RW          | $y=be^{mx}$ | 4.328  | -0.029¶ | 0.975 | Lyytkainen-Saarenmaa et al. (2002), Fig. 2 |
| 596 |                                                                                      |       |             |             |        |         |       |                                            |
| 597 | N. Temperate                                                                         | 0-100 | all         | $y=mx+b$    | 82.666 | -0.829  | 0.853 | <i>Pinus</i> above combined                |
| 598 |                                                                                      |       |             |             |        |         |       |                                            |
| 599 | <i>Orgyia pseudotsugata</i> (McDunnough) defoliation of <i>Psuedotsuga menziesii</i> |       |             |             |        |         |       |                                            |
| 600 |                                                                                      |       |             |             |        |         |       |                                            |
| 601 | British Columbia                                                                     | 0-81  | RW index    | $y=mx+b$    | 88.080 | -0.575  | 0.829 | Alfaro & Shepherd (1991), Table 1          |
| 602 |                                                                                      |       |             |             |        |         |       |                                            |
| 603 |                                                                                      |       |             |             |        |         |       |                                            |
| 604 | <i>Choristoneura fumiferana</i> defoliation on <i>Abies balsamea</i>                 |       |             |             |        |         |       |                                            |
| 605 |                                                                                      |       |             |             |        |         |       |                                            |
| 606 | Newfoundland                                                                         | 0-100 | Volume inc. | $y=mx+b$    | 100    | -0.63   | 0.950 | Dobesberger (1998), Equation 9‡            |
| 607 |                                                                                      |       |             |             |        |         |       |                                            |
| 608 | General defoliation on <i>Picea abies</i>                                            |       |             |             |        |         |       |                                            |
| 609 |                                                                                      |       |             |             |        |         |       |                                            |
| 610 | Finland                                                                              | 0-100 | Volume inc. | $y=mx+b$    | 116.31 | -1.019  | 0.579 | Salemaa & Jukola-Sulonen (1990), Fig. 3b   |
| 611 |                                                                                      |       |             |             |        |         |       |                                            |
| 612 | <i>Gilpinia hercyniae</i> (Hartig) defoliation on <i>Picea sitchensis</i>            |       |             |             |        |         |       |                                            |
| 613 |                                                                                      |       |             |             |        |         |       |                                            |
| 614 | Wales                                                                                | 0-70  | Volume inc. | $y=mx+b$    | 92.39  | -0.600  | 0.570 | Williams (2003), Tables 2 & 3              |
| 615 |                                                                                      |       |             |             |        |         |       |                                            |
| 616 | Manual defoliation of young <i>Larix laricina</i>                                    |       |             |             |        |         |       |                                            |
| 617 |                                                                                      |       |             |             |        |         |       |                                            |
| 618 | Manitoba                                                                             | 0-300 | Volume inc. | $y=be^{mx}$ | 5.146  | -0.010  | 0.800 | Ives & Nairn (1966), Fig. 1                |

\* Growth is scaled from 0-100% of expected growth, either modeled, derived or observed in a control or prior to disturbance. Growth was measured by ring widths (RW), RW index, radial increment, volume increment, or summerwood width or some derivation of these. Please consult original articles for details.

† Cumulative defoliation is the sum of annual defoliation (0-100%) over the duration of a single outbreak (typically 1-5+ years).

‡ Relationships published by original authors, included for comparison. When possible, formulae were rescaled to standardized ranges used here.

¶ Probability that parameter is different from zero between 0.05 and 0.10. Probability of unmarked parameters < 0.05.

§ Probability that parameter is different from zero > 0.10.

627 **Table 2.** Models of cumulative tree mortality or annual mortality rates derived from cumulative defoliation.  
 628

| 629 | Location                                                                         | Cum Defo. Range (%) | Mort. Var. (%) | Annual Rate | Equation           | b      | m      | R <sup>2</sup> | Reference                                       |
|-----|----------------------------------------------------------------------------------|---------------------|----------------|-------------|--------------------|--------|--------|----------------|-------------------------------------------------|
| 633 | <i>Lymantria dispar</i> (L.) defoliation of all species, <i>Quercus</i> dominant |                     |                |             |                    |        |        |                |                                                 |
| 634 |                                                                                  |                     |                |             |                    |        |        |                |                                                 |
| 635 | Pennsylvania                                                                     | 0-365               | BA             |             | $y=e^{(mx+b)}$     | 1.704  | 0.008  | 0.901          | Feicht et al. (1993), Table 2 & 3               |
| 636 |                                                                                  |                     |                | yes         | $(y+1)=e^{(mx+b)}$ | 0.521  | 0.006  | 0.876          | Feicht et al. (1993), Table 2 & 3               |
| 637 |                                                                                  |                     |                |             |                    |        |        |                |                                                 |
| 638 | New England                                                                      | 0-263               | stems          |             | $y=e^{(mx+b)}$     | 1.495  | 0.010  | 0.574          | Campbell & Valentine (1972), Tables 1,2,227-233 |
| 639 |                                                                                  |                     |                | yes         | $(y+1)=e^{(mx+b)}$ | 0.415§ | 0.007  | 0.662          | Campbell & Valentine (1972), Tables 1,2,227-233 |
| 640 |                                                                                  |                     |                |             |                    |        |        |                |                                                 |
| 641 | New England                                                                      | 0-80                | stems          | yes         | $y=e^{(mx+b)}$     | 1.611  | 0.010  | 0.773          | Baker (1941), Table 1                           |
| 642 |                                                                                  |                     |                |             |                    |        |        |                |                                                 |
| 643 | Pennsylvania                                                                     | 0-210               | stems          |             | $y=e^{(mx+b)}$     | 2.145  | 0.005  | 0.993          | Herrick & Gansner (1987)                        |
| 644 |                                                                                  |                     |                | yes         | $y=e^{(mx+b)}$     | 0.535  | 0.005  | 0.993          | Herrick & Gansner (1987)                        |
| 645 |                                                                                  |                     |                |             |                    |        |        |                |                                                 |
| 646 | N. America                                                                       | 0-365               | all            | yes         | $(y+1)=e^{(mx+b)}$ | 0.547  | 0.006  | 0.839          | Combined above, excluding Baker (1941)          |
| 647 |                                                                                  |                     |                |             |                    |        |        |                |                                                 |
| 648 | <i>Malacosoma disstria</i> (Hubn.) defoliation of <i>Populus tremuloides</i>     |                     |                |             |                    |        |        |                |                                                 |
| 649 |                                                                                  |                     |                |             |                    |        |        |                |                                                 |
| 650 | Ontario                                                                          | 0-300               | stems          |             | $y=e^{(mx+b)}$     | 2.135  | 0.008  | 0.918          | Man et al. (2008), Fig. 4 & Table 1             |
| 651 |                                                                                  |                     |                | yes         | $y=e^{(mx+b)}$     | 0.583  | 0.007  | 0.981          | Man et al. (2008), Fig. 4 & Table 1             |
| 652 |                                                                                  |                     |                |             |                    |        |        |                |                                                 |
| 653 | Minnesota                                                                        | 0-350               | stems          | yes         | $(y+1)=e^{(mx+b)}$ | 2.806  | 0.007  | 0.667          | Churchill et al. (1964), Table 1 and Text       |
| 654 |                                                                                  |                     |                |             |                    |        |        |                |                                                 |
| 655 | General defoliation of <i>Acer Saccharum</i>                                     |                     |                |             |                    |        |        |                |                                                 |
| 656 |                                                                                  |                     |                |             |                    |        |        |                |                                                 |
| 657 | N. America                                                                       | 0-95                | BA             | yes         | $y=e^{(mx+b)}$     | -0.784 | 0.045§ | 0.851§         | Hallett et al. (2006), Fig. 4                   |
| 658 |                                                                                  |                     |                |             |                    |        |        |                |                                                 |
| 659 |                                                                                  |                     |                |             |                    |        |        |                |                                                 |

Foster J.R. GROWTH AND MORTALITY RESPONSE TO DEFOLIATION

| 660 | Location                                                                                | Cum Defo. Range (%) | Mort. Var. (%) | Annual Rate | Equation             | <i>b</i> | <i>m</i> | R <sup>2</sup> | Reference                                        |
|-----|-----------------------------------------------------------------------------------------|---------------------|----------------|-------------|----------------------|----------|----------|----------------|--------------------------------------------------|
| 664 | <i>Lymantria dispar</i> (L.) defoliation on <i>Acer rubrum</i>                          |                     |                |             |                      |          |          |                |                                                  |
| 665 | New England                                                                             | 0-263               | stems          |             | $y = e^{(mx+b)}$     | 2.202    | 0.006 ¶  | 0.457          | Campbell & Valentine (1972), Tables 183-189      |
| 666 |                                                                                         |                     | yes            |             | $y = e^{(mx+b)}$     | 0.155 §  | 0.007    | 0.612          | Campbell & Valentine (1972), Tables 183-189      |
| 667 |                                                                                         |                     |                |             |                      |          |          |                |                                                  |
| 668 | <i>Lymantria dispar</i> (L.) defoliation on <i>Pinus strobus</i>                        |                     |                |             |                      |          |          |                |                                                  |
| 669 |                                                                                         |                     |                |             |                      |          |          |                |                                                  |
| 670 | New England                                                                             | 0-100               | stems          |             | $(y+1) = e^{(mx+b)}$ | 1.207 §  | 0.018 §  | 0.314          | Baker (1941), Table 3                            |
| 671 |                                                                                         |                     | yes            |             | $(y+1) = e^{(mx+b)}$ | 0.205 §  | 0.009    | 0.516          | Baker (1941), Table 3                            |
| 672 |                                                                                         |                     |                |             |                      |          |          |                |                                                  |
| 673 | <i>Choristoneura pinus pinus</i> (Free) on <i>Pinus banksiana</i> combined with above   |                     |                |             |                      |          |          |                |                                                  |
| 674 |                                                                                         |                     |                |             |                      |          |          |                |                                                  |
| 675 | N. America                                                                              | 0-138               | stems          |             | $(y+1) = e^{(mx+b)}$ | 1.552    | 0.014    | 0.418          | Baker (1941), Kulman et al. (1963), Gross (1992) |
| 676 |                                                                                         |                     | Yes            |             | $(y+1) = e^{(mx+b)}$ | 0.429 §  | 0.012    | 0.505          | Baker (1941), Kulman et al. (1963), Gross (1992) |
| 677 |                                                                                         |                     |                |             |                      |          |          |                |                                                  |
| 678 | <i>Choristoneura occidentalis</i> (Freeman) defoliation of <i>Psuedotsuga menziesii</i> |                     |                |             |                      |          |          |                |                                                  |
| 679 |                                                                                         |                     |                |             |                      |          |          |                |                                                  |
| 680 | British Columbia                                                                        | 150-400             | stems          |             | $y = e^{(mx+b)}$     | -1.163 § | 0.016    | 0.955          | Alfaro et al. (1982), Fig. 6                     |
| 681 |                                                                                         |                     | yes            |             | $(y+1) = e^{(mx+b)}$ | -3.424   | 0.016    | 0.955          |                                                  |
| 682 |                                                                                         |                     |                |             |                      |          |          |                |                                                  |
| 683 | <i>Lambdina fiscellaria fiscellaria</i> (Guen.) defoliation on <i>Abies balsamea</i>    |                     |                |             |                      |          |          |                |                                                  |
| 684 |                                                                                         |                     |                |             |                      |          |          |                |                                                  |
| 685 | New Brunswick                                                                           | 0-100               | stems          | yes         | $y = e^{(mx+b)}$     | -0.311 § | 0.040    | 0.830          | MacLean & Ebert (1999), Fig. 4                   |
| 686 |                                                                                         | 0-400               | stems          |             | $y = 10^{(mx+b)}$    | 0.647    | 0.006    | 0.790          | MacLean & Ebert (1999), Fig. 6 ‡                 |
| 687 |                                                                                         |                     | volume         | yes         | $y = 10^{(mx+b)}$    | 0.647    | 0.006    | 0.817          | MacLean & Ebert (1999), Fig. 6 ‡                 |
| 688 |                                                                                         |                     |                |             |                      |          |          |                |                                                  |
| 689 | <i>Choristoneura fumiferana</i> defoliation on <i>Abies balsamea</i>                    |                     |                |             |                      |          |          |                |                                                  |
| 690 |                                                                                         |                     |                |             |                      |          |          |                |                                                  |
| 691 | Ontario                                                                                 | 0-400               | stems          |             | $(y+1) = e^{(mx+b)}$ | -0.642   | 0.013    | 0.950          | Blaise (1958), Fig. 2 & Table 1                  |
| 692 |                                                                                         |                     | yes            |             | $(y+1) = e^{(mx+b)}$ | -0.445   | 0.006    | 0.890          | Blaise (1958), Fig. 2 & Table 1                  |

Foster J.R. GROWTH AND MORTALITY RESPONSE TO DEFOLIATION

|     |                              |         |       |     |                      |        |         |       |                                    |
|-----|------------------------------|---------|-------|-----|----------------------|--------|---------|-------|------------------------------------|
| 693 |                              |         |       |     |                      |        |         |       |                                    |
| 694 | Minnesota                    | 150-475 | BA    |     |                      |        |         |       |                                    |
| 695 |                              |         |       | yes | $(y+1) = e^{(mx+b)}$ | 0.891  | § 0.007 | 0.847 | Batzer (1973), Fig. 1              |
| 696 |                              |         |       |     | $(y+1) = e^{(mx+b)}$ | -0.23  | § 0.006 | 0.831 | Batzer (1973), Fig. 1              |
| 697 | N. America                   | 0-475   | all   |     |                      |        |         |       |                                    |
| 698 |                              |         |       | yes | $(y+1) = e^{(mx+b)}$ | -0.352 | § 0.011 | 0.914 | Batzer (1973), Blaise (1958)       |
| 699 |                              |         |       |     | $(y+1) = e^{(mx+b)}$ | -0.417 | 0.006   | 0.900 | Batzer (1973), Blaise (1958)       |
| 700 | All defoliation, all species |         |       |     |                      |        |         |       |                                    |
| 701 |                              |         |       |     |                      |        |         |       |                                    |
| 702 | Switzerland                  | 0-100   | stems | yes | $y = e^{(mx+b)}$     | -3.050 | 0.062   | 0.924 | Dobbertin and Brang (2001), Fig. 1 |
| 703 |                              |         |       |     |                      |        |         |       |                                    |

---

704 \* Mortality ranges from 0-100% of the live tree population expressed as number of stems, basal area (BA), or volume.  
 705 † Cumulative defoliation is the sum of defoliation (0-100%) over the duration of a single outbreak.  
 706 ‡ Relationships published by original authors, included for comparison. When possible, formulae were rescaled to standardized ranges  
 707 used here.  
 708 ¶ Probability that parameter is different from zero between 0.05 and 0.10. Probability of unmarked parameters < 0.05.  
 709 § Probability that parameter is different from zero > 0.

Foster J.R. GROWTH AND MORTALITY RESPONSE TO DEFOLIATION

710

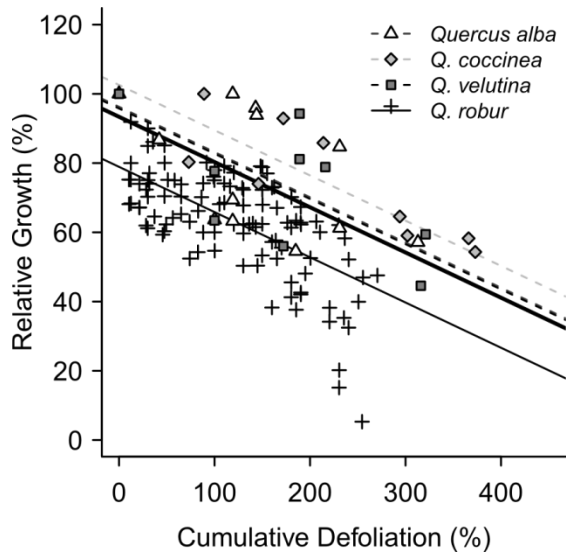

711

712

713

714 **Figure 1.** Growth response of *Quercus* species to *Lymantria dispar* (L.) (gypsy moth) defoliation

715 including *Quercus robur* (Rubstov 1996), *Q. velutina* (Baker 1941), *Q. rubra* (Wargo 1981), and

716 *Quercus alba* (Baker 1941, Wargo 1981). Lines show best fit mixed model (Appendix S3, Table

717 S3-1). The best combined *Quercus* model varied intercepts but not slopes.

718



## Foster J.R. GROWTH AND MORTALITY RESPONSE TO DEFOLIATION

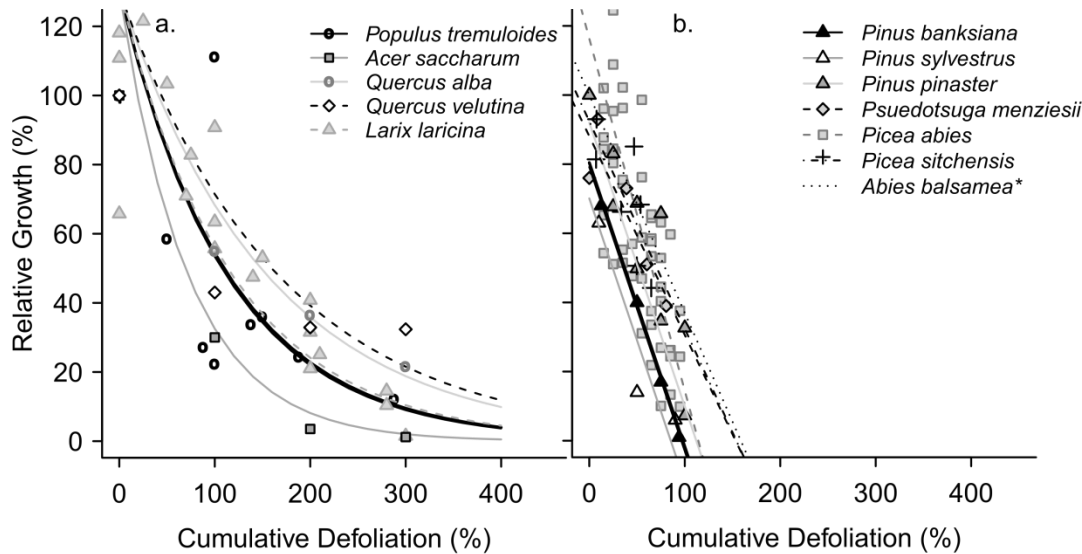

719

720 **Figure 2.** Growth decreases curvilinearly in response to defoliation (a.) in *Populus tremuloides*  
721 (Rose 1958), manually defoliated juvenile trees of *Acer saccharum*, *Q. alba*, and *Q. velutina*  
722 (Wargo 1981), and *Larix laricina* (Ives and Nairn 1966). Growth of conifer species declined  
723 linearly (b.) and included steep declines in *Pinus banksiana*, *P. pinaster*, *P. sylvestrus* with  
724 slower declines in *Pseudotsuga menziesii*, *Picea abies*, and *Abies balsamea*. The best fit mixed  
725 model in (a., lines) randomly varied slopes but not intercepts (Appendix S3, Table S3-1). Lines  
726 in (b.) show model fits from Table 1 and the best mixed model for *Pinus* species that varied  
727 intercept, but not slope (Appendix). *A. balsamea* relationship was published by Dobesberger  
728 1998.

## Foster J.R. GROWTH AND MORTALITY RESPONSE TO DEFOLIATION

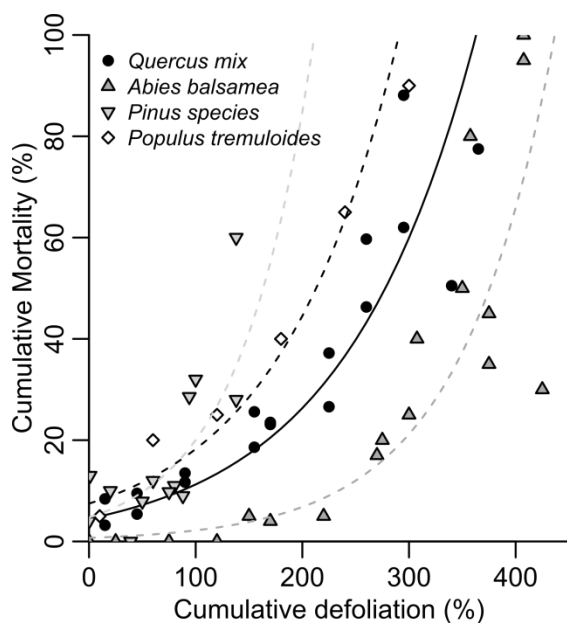

729

730 **Figure 3.** Cumulative mortality increased exponentially in response to accumulated defoliation.

731 Mortality rates rise most quickly in *Pinus* (Baker 1941, Kulman et al. 1963, Gross 1992),

732 followed by diffuse-porous *Populus* (Mann et al. 2007), and then ring-porous *Quercus*

733 dominated forests (Feicht et al. 1993). Mortality in *Abies* appears to rise more slowly (Blais

734 1958, Batzer 1973), but defoliation in this system is defined differently as damage by foliage

735 age-class. Lines show model fits from Table 2. All plots can be found in Appendix S2.

736
